# Supplementary material for: The P2X7 receptor regulates cell survival, migration and invasion of pancreatic ductal adenocarcinoma cells
Source: PubMed Central journal article supplement (PMC4660609; doi:10.1186/s12943-015-0472-4), 2015-11-25

# Panc-1

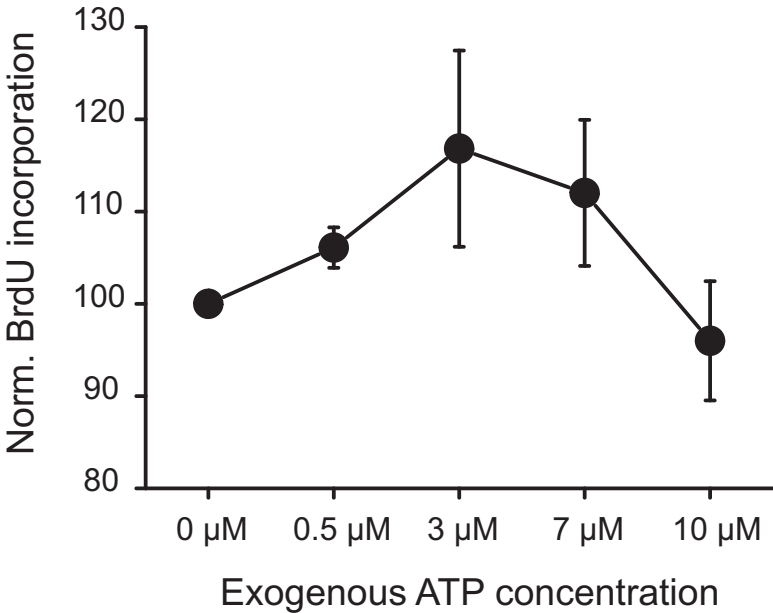

Supplement: 12943_2015_472_MOESM3_ESM.pdf [file 12943_2015_472_MOESM3_ESM.pdf]
