# Supplementary material for: The P2X7 receptor regulates cell survival, migration and invasion of pancreatic ductal adenocarcinoma cells
Source: Springer Nature journal article supplement (doi:10.1186/s12943-015-0472-4), 2015-11-25

# Panc-1

**A**

20 h

40 h

60 h

control

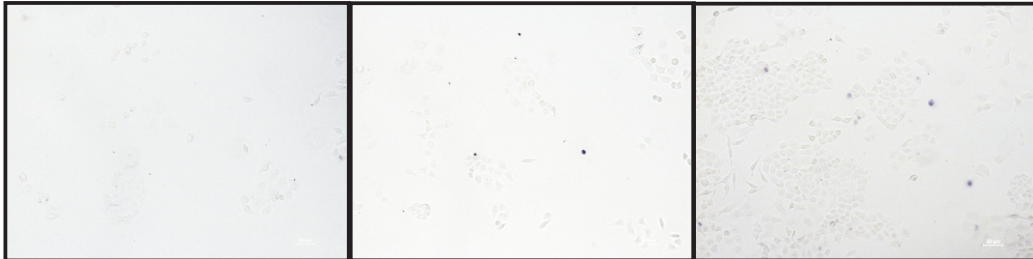

AZ10606120

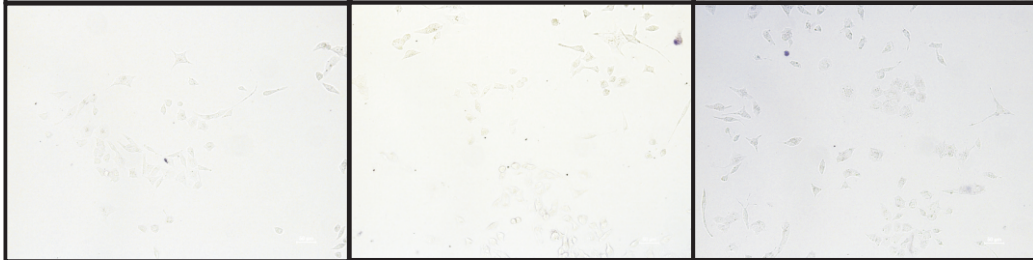

# BxPC-3

**B**

20 h

40 h

60 h

control

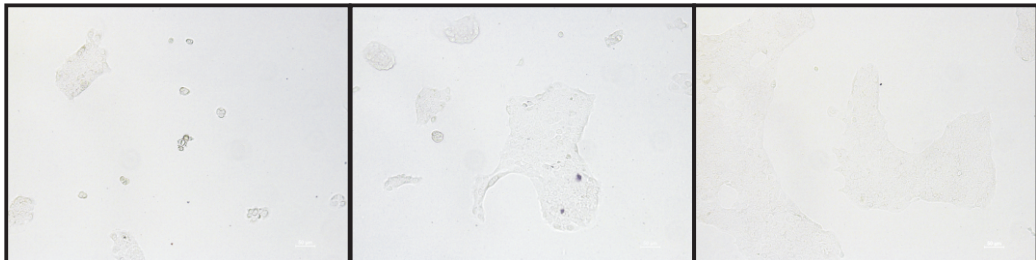

AZ10606120

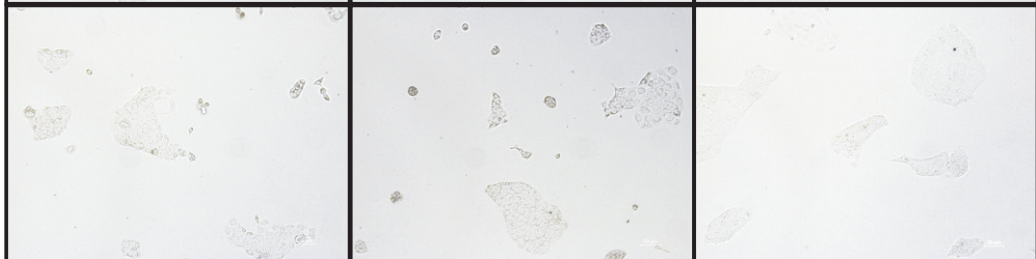

Supplement: MOESM4 [file 9763294]
